# Supplementary material for: A microfluidic plasma separation device combined with a surface plasmon resonance biosensor for biomarker detection in whole blood
Source: Royal Society of Chemistry journal article supplement (doi:10.1039/d2lc00693f), 2023-01-01
Supplement: d2lc00693f1.pdf [file d2lc00693f1.pdf]

## Supplementary Information for

# A Microfluidic Plasma Separation Device Combined with Surface Plasmon Resonance for Biomarker Detection in Whole Blood

**Table S1** Information about IgG and IgM protein used in our study.

| Sample                                     | Host species | Molecular weight (kDa) | Purity               | Description         | Concentration             | Physical form |
|--------------------------------------------|--------------|------------------------|----------------------|---------------------|---------------------------|---------------|
| Native Human IgG Protein (ab91102)         | Human        | 150                    | 95 % SDS-PAGE        | Full length protein | 10mg (wt)                 | Lyophilized   |
| Anti-Human IgG antibody [IG266] (ab200699) | Mouse        | 75                     | Protein A/G purified | Monoclonal          | 500 $\mu$ l at 0.2 mg/ml  | Liquid        |
| Native Human IgM Protein (ab91117)         | Human        | 950                    | 95 % SDS-PAGE        | Full length protein | 1 mg at 1.33 - 1.98 mg/ml | Liquid        |
| Anti-IgM antibody [KT16] (ab110653)        | Mouse        | N/A                    | Protein A purified   | Monoclonal          | 100 $\mu$ g at 1 mg/ml    | Liquid        |

### Flow cytometry analysis:

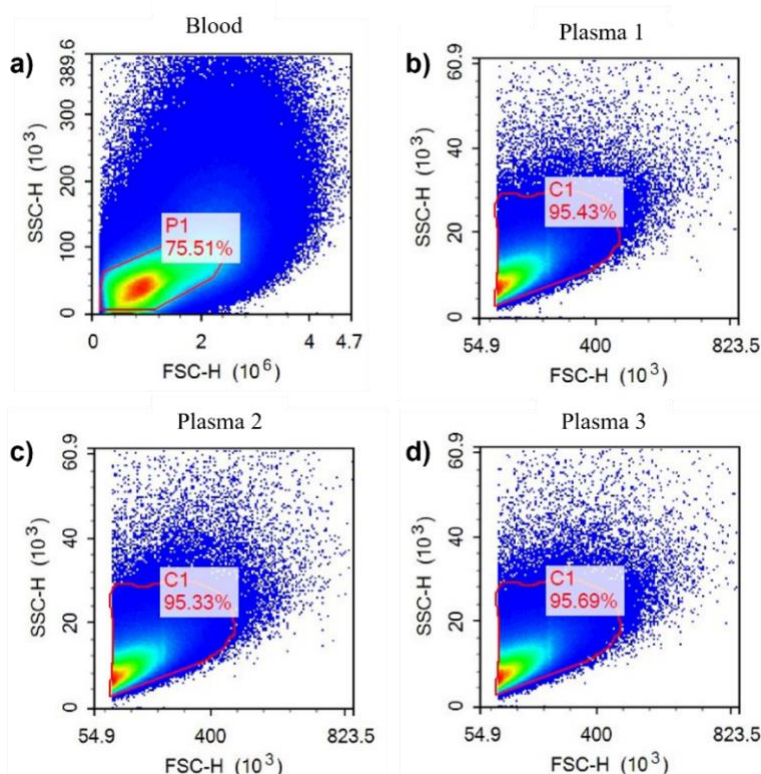

**Fig. S1** Flow cytometry analysis of blood samples vs collected plasma before and after filtration using PPS-V2 device. (a) Blood sample and (b), (c), (d) filtered plasma samples with same gating. Blood cells (red) and platelets (blue) are gated on forward scatter (FSC-H) and side scatter (SSC-H).

Flow cytometry analysis was performed for the collected plasma from the PPS-V2 device outlet. At first, 22µl of plasma is collected from the outlet of the three PPS-V2 devices to prepare three plasma samples from the same whole blood sample. All collected plasma samples were diluted (1:10 dilution ratio) in PBS buffer solution containing 1× phosphate-buffered saline (PBS), 0.05% sodium azide (NaN<sub>3</sub>) and 2 g/l bovine serum albumin (BSA) to avoid cell adhesion to the channel walls. Four samples of 300 µl each diluted blood and plasma samples were prepared for the flow cytometry analysis and analyzed write after filtration. All cells were counted through flow cytometry (NovoCyte Flow Cytometer, Agilent Technologies, San Diego, CA, USA) and Figure S1 is generated for unfiltered blood and filtered plasma samples. Blood cells were assessed from the dot plot representation and subsequently gated through forward (FSC) and side scatter (SSC) and set to a linear scale (Fig. S1). From Figure S1 (a), the overlap of RBC and WBC populations in forward and side scatter were counted together as blood cells and same gating were applied to plasma samples for comparison.

The purity (*P*) of the PPS-V2 device is calculated using equation 1.s

$$P = \frac{\text{\#of filtered cell}}{\text{\#of total cell}} \% \dots\dots\dots(1)$$

The number of filtered cells were calculated from the flow cytometry data as shown in Table S2.

**Table S2: Flow cytometry data for the blood and filtered plasma samples using PPS-V2 device.**

| Sample   | Count   | Abs. Count | % Parent | Median X | Median Y | Filtered cell | Purity      |
|----------|---------|------------|----------|----------|----------|---------------|-------------|
| Blood    | 2712630 | 1176720800 | 75.51    | 953543   | 44518    |               |             |
| Plasma 1 | 805437  | 164663600  | 95.43    | 150234   | 9770     | 1012057200    | 86.00657012 |
| Plasma 2 | 764390  | 156168200  | 95.33    | 150863   | 9690     | 1020552600    | 86.72852558 |
| Plasma 3 | 783474  | 160118600  | 95.69    | 151731   | 9644     | 1016602200    | 86.39281298 |

Our system recorded a purity of 86.37. The yield (*Y*) of the system is calculated using the formula below (equation 2).

$$Y = \frac{\text{Collected volume of plamsa using our system}}{\text{Collected volume of plasma for ideal condition}} \% \dots\dots\dots(2)$$

Our system recorded a yield of 25% which is comparable to a high performing whole blood-plasma filtration system.

**Table S3. Comparison between PPS (Version 1) and PPS-V2**

| Performance parameters        | PPS (Version 1)                                                   | PPS-V2                                                                                            |
|-------------------------------|-------------------------------------------------------------------|---------------------------------------------------------------------------------------------------|
| Collected plasma volume       | 22ul                                                              | 22ul                                                                                              |
| Blood inlet size              | 80-160ul                                                          | 80-160ul                                                                                          |
| Dead-end volume               | 9ul                                                               | 4.9ul                                                                                             |
| Method for separation         | Sedimentation and primary separation by membrane                  | Sedimentation and primary separation by self-built-in filter and secondary separation by membrane |
| Driving force                 | Capillary and micropump                                           | Capillary and micropump                                                                           |
| Purity                        | ~90%                                                              | ~86%                                                                                              |
| Need for parafilm             | Yes (to seal inlet for inversion)                                 | No                                                                                                |
| Need for inversion technique  | Yes                                                               | No                                                                                                |
| Filtration time               | 20 min (for inversion)                                            | 15 min                                                                                            |
| Extraction efficiency (yield) | 25%                                                               | 25%                                                                                               |
| Ease of integration           | Not easy because of inversion technique, leakage through parafilm | Easy to integrate at outlet                                                                       |

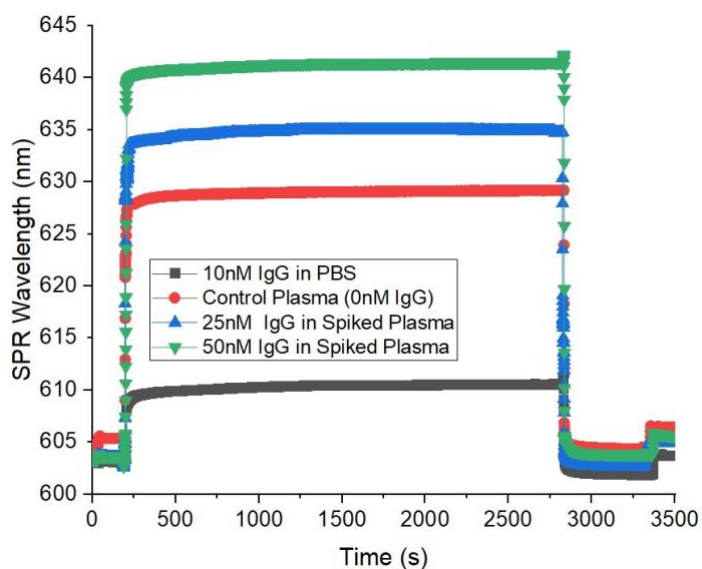

**Fig. S2** SPR Wavelength (nm) vs time (s) response for IgG in spiked plasma and PBS.

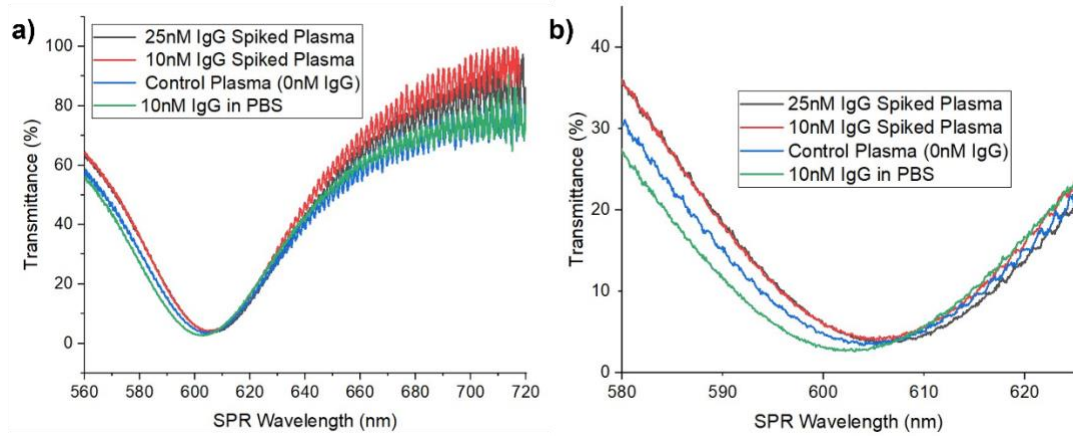

**Fig. S3** (a) SPR wavelength vs transmittance for 10nM IgG in PBS, 25nM and 50 nM IgG spiked blood-plasma. (b) The enlarged version of the same showing SPR wavelength shift compared to control plasma.

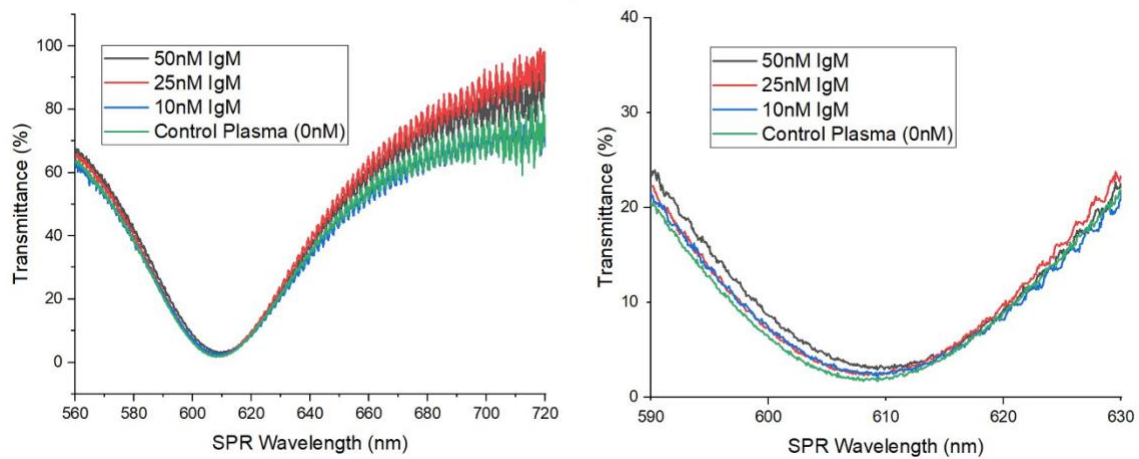

**Fig. S4** (a) SPR wavelength vs transmittance for 10, 25 and 50 nM IgM spiked blood-plasma. (b) The enlarged version of the same showing SPR wavelength shift compared to control plasma.
